# Supplementary material for: Baseline and Kinetic Circulating Tumor Cell Counts Are Prognostic Factors in a Prospective Study of Metastatic Colorectal Cancer
Source: MDPI journal article supplement (doi:10.3390/diagnostics11030502), 2021-03-12
Supplement: s1 [file s1]

## Supplementary files

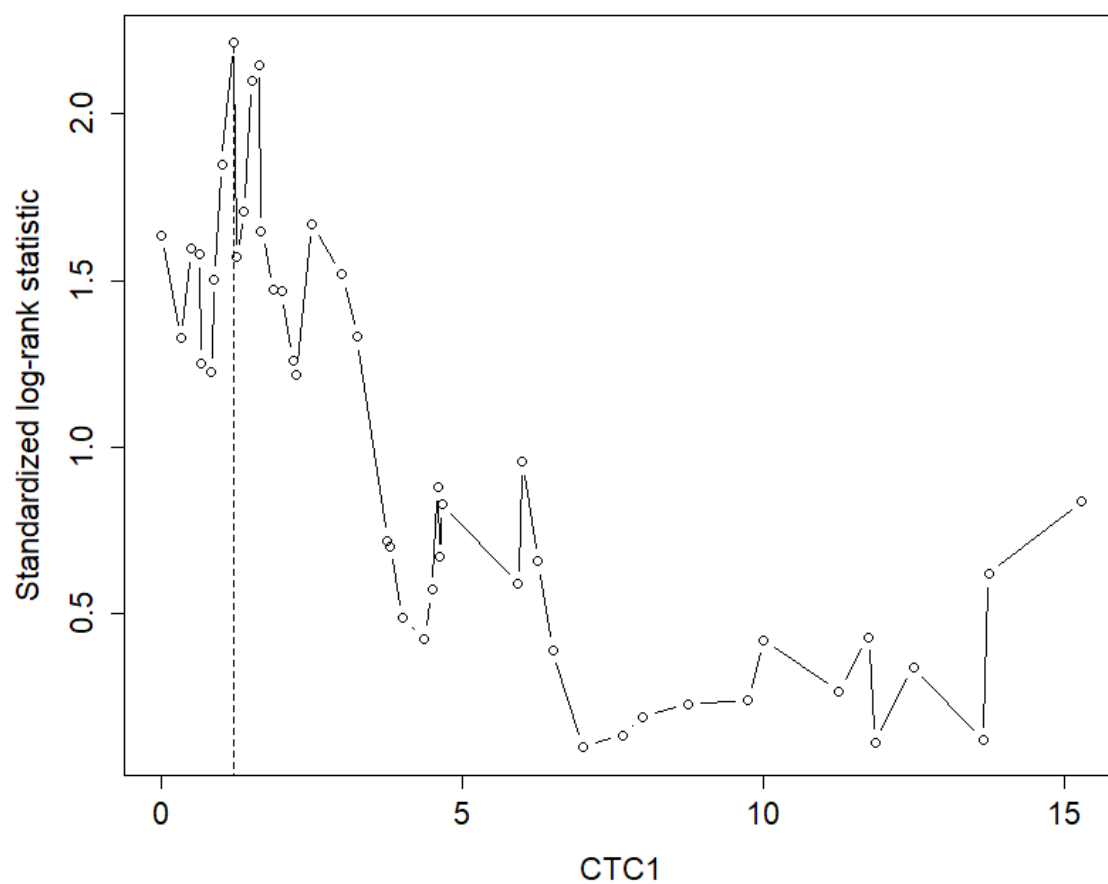

**Supplementary Figure S1.** Lausen and Schumacher method to determine the best cut-off point for CTC1

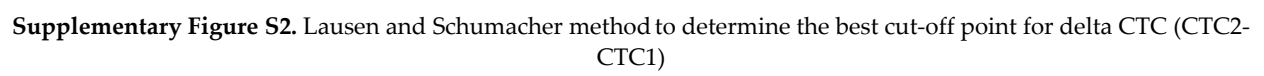

**Supplementary Figure S2.** Lausen and Schumacher method to determine the best cut-off point for delta CTC (CTC2-CTC1)
